# Supplementary material
Source: PubMed Central journal article supplement (PMC3183264)
Supplement: NIHMS322305-supplement-1_si_001.pdf [file NIHMS322305-supplement-1_si_001.pdf]

## **SUPPORTING INFORMATION**

### **REVERSIBLE HEME-DEPENDENT REGULATION OF HUMAN CYSTATHIONINE $\beta$ - SYNTHASE BY REDUCTIVE CARBOXYLATION<sup>†</sup>**

Omer Kabil<sup>1</sup>, Colin L. Weeks<sup>2</sup>, Sebastián Carballal<sup>3,4</sup>, Carmen Gherasim<sup>1</sup>, Beatriz Alvarez<sup>3</sup>, Thomas G.  
Spiro<sup>2</sup> and Ruma Banerjee<sup>1</sup>

## EXPERIMENTAL PROCEDURES

*Purification of CBS and MSR*—Recombinant human CBS (1) and MSR (2) were purified as described previously. The activity of ferric, ferrous and ferrous-CO CBS were measured under anaerobic conditions using the radiolabeled assay as described (1).

*Reductive Carbonylation of CBS with MSR and CO*—The reaction mixture for reductive carbonylation of CBS contained 0.5  $\mu$ M MSR, 0.5 mM NADPH and 5  $\mu$ M CBS in 100 mM potassium phosphate buffer, pH 7.4, prepared under anaerobic conditions in a quartz cuvette. The spectrum of reduced MSR was recorded and served as the baseline before addition of CBS and changes in the heme spectrum were monitored by UV-visible absorption spectroscopy. The cuvette was sealed and the headspace was purged with CO for 15 min. Alternatively, the CO-saturated buffer was employed. Ferrous-CO CBS was oxidized by exposing the sample to air for 30 to 45 min.

*CBS-CO Photolysis*—The CO adduct of CBS was prepared by adding an excess of sodium dithionite to a solution of ferric CBS (23-50  $\mu$ M) in 100 mM Tris buffer, pH 8.6 saturated with CO. The ferrous-CO CBS solution was left for 2 h after initiation of CO binding to allow time for conversion of PLP to the enolimine tautomer. The sample (1-1.5 mL) was then placed in a 5 mL pear-shaped flask in an ice-bath, and evacuated/Ar-purged three times prior to the start of photolysis. Photolysis was carried out using a lamp equipped with a halogen bulb (300 W, 120 V, Osram ELH) with a gentle stream of Ar blowing over the solution while it was slowly stirred for 40-60 min. A 3 L glass beaker filled with water was employed as a simple lens to focus the light onto the ferrous-O CBS solution. The sample was evacuated twice during the irradiation period, then Ar purging was resumed.

*Spectroscopic Characterization*—Fluorescence emission spectra were recorded on a Perkin-Elmer LS-50B fluorimeter with 410 nm excitation as previously described (3). Raman spectra were recorded using 390 nm excitation from a Ti:sapphire 1 kHz pulsed laser as previously described (3). UV-visible absorption spectra of CBS solutions in a 1.0 cm quartz cuvette or the 0.4 cm quartz fluorescence cuvette

were recorded using an Agilent 8453 diode array spectrophotometer. The concentrations of the CBS solutions were determined using  $\epsilon_{428} = 81 \text{ mM}^{-1} \text{ cm}^{-1}$  for ferric CBS (4).

## SI References

1. Taoka, S., Ohja, S., Shan, X., Kruger, W. D., and Banerjee, R. (1998) Evidence for heme-mediated redox regulation of human cystathionine beta-synthase activity, *J Biol Chem* 273, 25179-25184.
2. Olteanu, H., and Banerjee, R. (2001) Human methionine synthase reductase, a soluble P-450 reductase-like dual flavoprotein, is sufficient for NADPH-dependent methionine synthase activation, *J Biol Chem* 276, 35558-35563.
3. Weeks, C. L., Singh, S., Madzelan, P., Banerjee, R., and Spiro, T. G. (2009) Heme regulation of human cystathionine beta-synthase activity: insights from fluorescence and Raman spectroscopy, *J Am Chem Soc* 131, 12809-12816.
4. Kery, V., Poneleit, L., Meyer, J. D., Manning, M. C., and Kraus, J. P. (1999) Binding of pyridoxal 5'-phosphate to the heme protein human cystathionine beta-synthase, *Biochemistry* 38, 2710-2724.

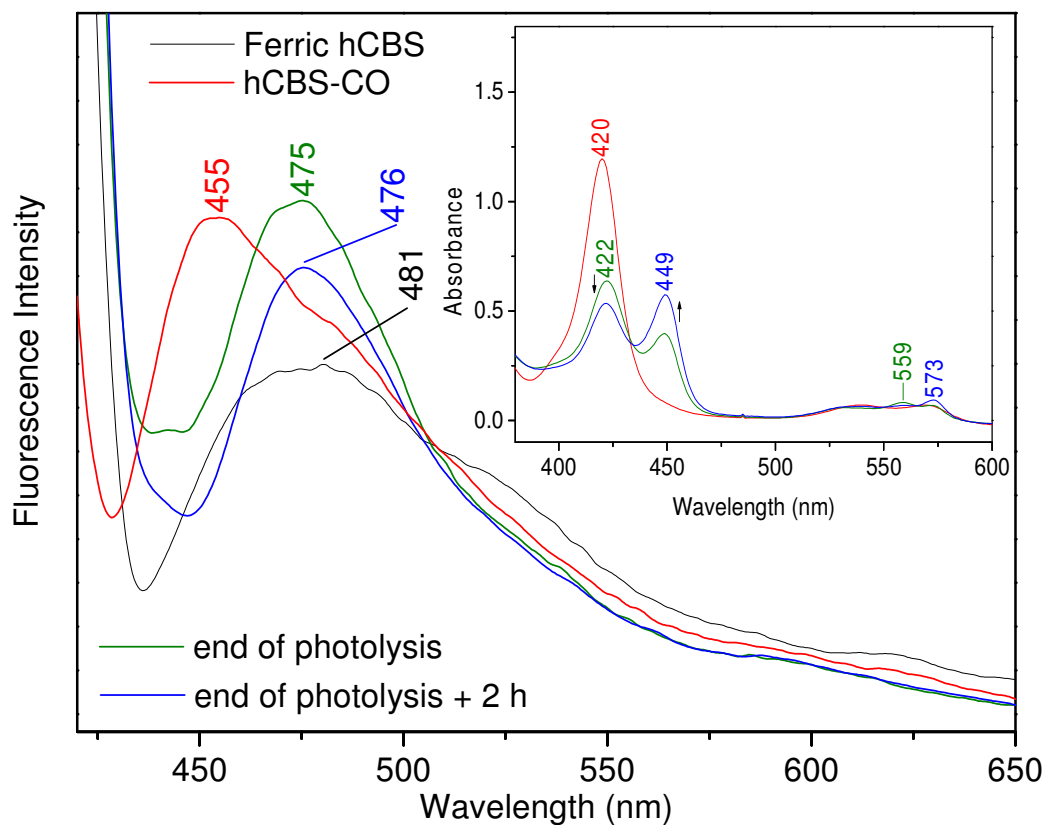

**Figure S1** Fluorescence emission spectra of the indicated forms of 23  $\mu\text{M}$  CBS in Tris buffer pH 8.6 (100 mM) recorded using excitation at 410 nm. Spectra were obtained from a sample that was converted from ferric CBS to ferrous-CO CBS and then photolyzed. *Inset*: UV-visible absorption spectra.

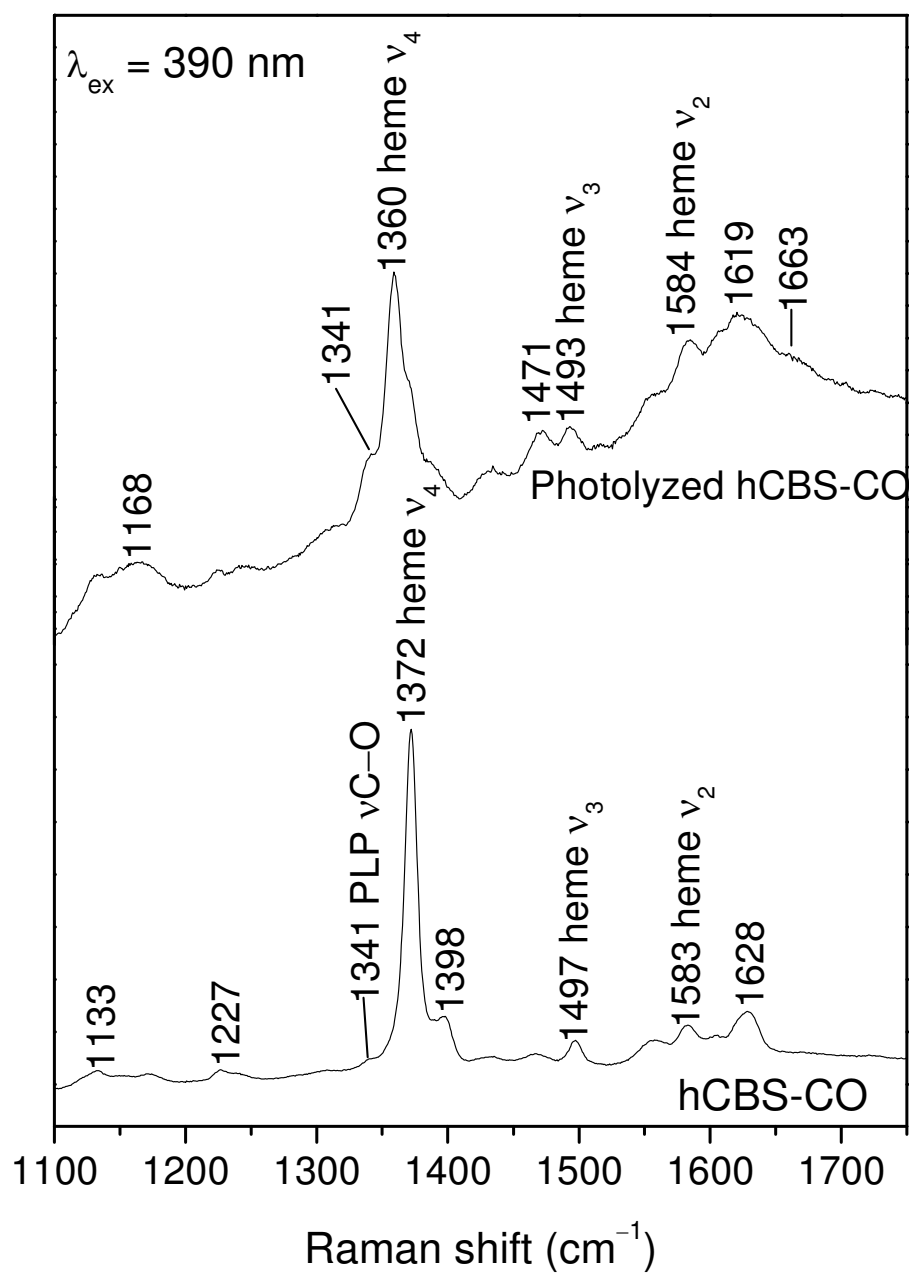

**Figure S2.** Raman spectra of photolyzed CBS-CO and ferrous-CO CBS obtained using 390 nm excitation. These spectra were used for deconvolution as shown in Fig. 2.
